# Supplementary material for: Metagenomics-Based Discovery of New Hepadnaviruses
Source: Preprints.org preprint supplement (doi:10.20944/preprints202311.1267.v1), 2023-11-21
Supplement: Supplementary file 1 [file supplementary]

## Sheet: Sheet1
Coverage	GenBase accession	Virus	Host	SRA accession	Bioproject	Biosample
1	C_AA050214	Blackbird-agel788-i	Blackbird (Agelaius tricolor)	SRR19156788	PRJNA834141	SAMN25872474
1	C_AA050215	Canary-seri372-i	Canary (Serinus canaria)	SRR2915372	PRJNA300534	SAMN04263680
1	C_AA050216	Finch-taen113-i	Finch (Taeniopygia guttata)	SRR15012113	PRJNA741250	SAMN19981835
1	C_AA050217	Grosbeak-pheu246-i	Grosbeak (Pheucticus ludovicianus x Piranga olivacea)	SRR20754246	PRJNA861242	SAMN29892315
1	C_AA050218	Gull-laru273-i	Gull (Larus relictus)	SRR14041273	PRJNA314730	SAMN04542848
1	C_AA050219	Hornbill-buce906-i	Hornbill (Buceros rhinoceros silvestris)	SRR952906	PRJNA212887	SAMN02318191
1	C_AA050220	Hummingbird-caly127-i	Hummingbird (Calypte anna)	SRR21777127	PRJNA785156	SAMN31119257
1	C_AA050221	Kingfisher-halc396-i	Kingfisher (Halcyon leucocephala)	SRR10176396	PRJNA573940	SAMN12836824
1	C_AA050222	QuailThrush-cinc826-i	Quail-thrush (Cinclosoma clarum)	SRR10852826	PRJNA599522	SAMN13755141
1	C_AA050223	Seriema-cari485-i	Seriema (Cariama cristata)	SRR953485	PRJNA212889	SAMN02318733
1	C_AA050224	Sparrow-zono391-i	Sparrow (Zonotrichia albicollis)	SRR7467391	PRJNA478852	SAMN09533518
1	C_AA050225	Tit-aegi626-i	Tit (Aegithalos iouschistos)	SRR7244626	PRJNA470787	SAMN09104369
1	C_AA050226	Amphipod-gamm839-B-gamm	Amphipod (Gammarus pisinnus)	SRR6678839	PRJNA433068	SAMN08469980
1	C_AA050227	Amphipod-gamm841-D-gamm	Amphipod (Gammarus pisinnus)	SRR6678841	PRJNA433068	SAMN08469978
1	C_AA050228	Bat-rhin952	Bat (Rhinolophus affinis)	SRR14464952	PRJNA727985	SAMN19066866
1	C_AA050229	Bat-rous024	Bat (Rousettus leschenaultii)	SRR9644024	PRJNA552190	SAMN12179582
0.977	C_AA050230	Bean-cyam604-g-C	Bean (Cyamopsis tetragonoloba)	SRR10120604, SRR10120605	PRJNA564412	SAMN12711771, SAMN12711770
1	C_AA050231	Bean-glyc845-Frog	Bean (Glycine max)	SRR3233845	PRJNA315512	SAMN04563588
1	C_AA050232	Bivalve-corb131-C	Bivalve (Corbicula fluminea)	SRR1104131	PRJNA233575	SAMN02570305
1	C_AA050233	Bluegrass-poa077-C	Bluegrass (Poa pratensis)	SRR5463077	PRJNA383017	SAMN06758771
1	C_AA050234	Buffalo-buff360	African buffalo (Syncerus caffer)	ERR3870360	PRJEB36587	SAMEA6520490
0.945	C_AA050235	Cabbage-bras104-g-Frog	Cabbage (Brassica oleracea)	SRR8109104, SRR8109105	PRJNA498278	SAMN10287202, SAMN10287177
1	C_AA050236	Carp-gymn929	Carp (Gymnocypris namensis)	SRR8617929	PRJNA513236	SAMN10700391
1	C_AA050237	Carp-schi040	Carp (Schizopygopsis younghusbandi)	SRR8618040	PRJNA513236	SAMN10700441
1	C_AA050238	Cherry-prun228-Frog	Cherry (Prunus avium)	SRR8797228	PRJNA529517	SAMN11269079
1	C_AA050239	Chicken-gall541	Chicken (Gallus gallus)	SRR8879541	PRJNA532290	SAMN11393724
1	C_AA050240	Chimpanzee-pan053	Chimpanzee (Pan troglodytes)	SRR8675053	PRJNA525703	SAMN11058382
1	C_AA050241	Chimpanzee-pan098	Chimpanzee (Pan troglodytes)	SRR8675098	PRJNA525703	SAMN11058376
0.992	C_AA050242	Chimpanzee-pan114-g	Chimpanzee (Pan troglodytes)	SRR8675114	PRJNA525703	SAMN11058261
1	C_AA050243	Chimpanzee-pan136	Chimpanzee (Pan troglodytes)	SRR8675136	PRJNA525703	SAMN11058370
1	C_AA050244	Chimpanzee-pan162	Chimpanzee (Pan troglodytes)	SRR8675162	PRJNA525703	SAMN11058487
1	C_AA050245	Chimpanzee-pan898	Chimpanzee (Pan troglodytes)	SRR8674898	PRJNA525703	SAMN11058321
1	C_AA050246	Chimpanzee-pan941	Chimpanzee (Pan troglodytes)	SRR8674941	PRJNA525703	SAMN11058231
1	C_AA050247	Cichlid-asta386	African cichlid (Astatotilapia calliptera)	ERR6844386, ERR6844387, ERR6844359	PRJEB27810	SAMEA6260563, SAMEA6260492, SAMEA6260567
1	C_AA050248	Cichlid-asta966-AMDV	African cichlid (Astatotilapia calliptera)	ERR10483966, ERR10483972, ERR10483936	PRJEB57348	SAMEA111561281, SAMEA111561287, SAMEA111561251
1	C_AA050249	Cichlid-aulo005	African cichlid (Aulonocranus dewindti)	SRR9689005	PRJNA552202	SAMN12246434
1	C_AA050250	Cichlid-boul174	African cichlid (Boulengerochromis microlepis)	SRR9680174	PRJNA552202	SAMN12246564
1	C_AA050251	Cichlid-call050	African cichlid (Callochromis pleurospilus)	SRR9680050	PRJNA552202	SAMN12246619
1	C_AA050252	Cichlid-cyat098	African cichlid (Cyathopharynx furcifer)	SRR9688098	PRJNA552202	SAMN12246926
1	C_AA050253	Cichlid-cypr446	African cichlid (Paracyprichromis brieni)	SRR9686446	PRJNA552202	SAMN12247818
1	C_AA050254	Cichlid-enan156	African cichlid (Enantiopus melanogenys)	SRR9688156	PRJNA552202	SAMN12247049
1	C_AA050255	Cichlid-juli549	African cichlid (Julidochromis dickfeldi)	SRR9688549	PRJNA552202	SAMN12246805
1	C_AA050256	Cichlid-lamp675	African cichlid (Lamprologus ocellatus)	SRR9686675	PRJNA552202	SAMN12247383
1	C_AA050257	Cichlid-opht805	African cichlid (Ophthalmotilapia ventralis)	SRR9680805	PRJNA552202	SAMN12247737
1	C_AA050258	Cichlid-opht834	African cichlid (Ophthalmotilapia ventralis)	SRR9680834	PRJNA552202	SAMN12247747
0.998	C_AA050259	Cichlid-oreo330-g	African cichlid (Oreochromis sp. BJ-2021)	SRR13589330	PRJNA690595	SAMN17487513
1	C_AA050260	Cichlid-simo376	African cichlid (Simochromis diagramma)	SRR9688376	PRJNA552202	SAMN12248384
1	C_AA050261	Cichlid-telm952	African cichlid (Telmatochromis temporalis)	SRR9687952	PRJNA552202	SAMN12248114
0.998	C_AA050262	Cichlid-trop300-g	African cichlid(Tropheus sp. 'Ikola')	SRR12532299, SRR12532300	PRJNA658843	SAMN15890902, SAMN15890901
0.998	C_AA050263	Cichlid-trop302-g	African cichlid (Tropheus sp. 'Ikola')	SRR12532302	PRJNA658843	SAMN15890900
1	C_AA050264	Cichlid-xeno160	African cichlid (Xenotilapia sp. 'spilopterus north' AB-2019)	SRR9670160	PRJNA552202	SAMN12248840
1	C_AA050265	Crab-sesa930-D-gamm	Crab (Parasesarma affine)	SRR6668930, SRR6668929, SRR6668931	PRJNA432832	SAMN08462674, SAMN08462675, SAMN08462676
1	C_AA050266	Cress-arab020-C	Thale cress (Arabidopsis thaliana)	SRR946020		SAMN02298433
1	C_AA050267	Croaker-lari891-D-gamm	Large yellow croaker (Larimichthys crocea)	SRR10033891	PRJNA562046	SAMN12632442
1	C_AA050268	Croaker-lari894-D-gamm	Large yellow croaker (Larimichthys crocea)	SRR10033894	PRJNA562046	SAMN12632445
1	C_AA050269	Dog-cani315-Frog	Dog (Canis lupus familiaris)	SRR2960315	PRJNA302374	SAMN04293766
1	C_AA050270	Dragonfish-akar681-l	Antarctic dragonfish (Akarotaxis nudiceps)	ERR4556681	PRJEB25429	SAMEA5574017
1	C_AA050271	Duck-anas026	Duck (Anas platyrhynchos)	SRR5098026	PRJNA357037	SAMN06131564
1	C_AA050272	Duck-anas070	Duck (Anas platyrhynchos)	SRR7370070	PRJNA476836	SAMN09460262
1	C_AA050273	Duck-anas154	Duck (Anas platyrhynchos)	SRR10058154	PRJNA563502	SAMN12675094
1	C_AA050274	Duck-anas235	Duck (Anas platyrhynchos)	SRR8707235	PRJNA526427	SAMN11098746
1	C_AA050275	Duck-anas269	Duck (Anas platyrhynchos)	SRR8296269	PRJNA509092	SAMN10537198
1	C_AA050276	Duck-anas367	Duck (Anas platyrhynchos)	SRR7811367	PRJNA489980	SAMN10022762
1	C_AA050277	Duck-anas407	Duck (Anas platyrhynchos)	SRR11040407	PRJNA605347	SAMN14055997
1	C_AA050278	Duck-anas453	Duck (Anas platyrhynchos)	SRR11068453	PRJNA606072	SAMN14082708
1	C_AA050279	Duck-anas556	Duck (Anas platyrhynchos)	SRR1295556	PRJNA248056	SAMN02796371
1	C_AA050280	Duck-anas572	Duck (Anas platyrhynchos)	SRR7146572	PRJNA470776	SAMN09104749
1	C_AA050281	Duck-anas796	Duck (Anas platyrhynchos)	SRR4434796	PRJNA349262	SAMN05929770
1	C_AA050282	Duck-anas813	Duck (Anas platyrhynchos)	SRR8053813	PRJNA496401	SAMN10240517
1	C_AA050283	Duck-anas817	Duck (Anas platyrhynchos)	SRR8053817	PRJNA496401	SAMN10240507
1	C_AA050284	Duck-anas818	Duck (Anas platyrhynchos)	SRR8053818	PRJNA496401	SAMN10240508
1	C_AA050285	Duck-anas821	Duck (Anas platyrhynchos)	SRR8053821	PRJNA496401	SAMN10240512
1	C_AA050286	Duck-anas827	Duck (Anas platyrhynchos)	SRR8905827	PRJNA533026	SAMN11432027
1	C_AA050287	Duck-chen299	Duck (Chenonetta jubata)	SRR8189299	PRJNA505206	SAMN10410813
1	C_AA050288	Eel-angu194	European eel (Anguilla anguilla)	SRR8074194	PRJNA419718	SAMN08095693
0.976	C_AA050289	Eel-angu693-g-B	European eel (Anguilla anguilla)	SRR5892693	PRJNA397047	SAMN07446906
1	C_AA050290	Eel-angu694-C	European eel (Anguilla anguilla)	SRR5892694	PRJNA397047	SAMN07446906
1	C_AA050291	Elephantfish-brie291-l	Elephantfish (Brienomyrus brachyistius)	SRR19539291	PRJNA845764	SAMN28860763
1	C_AA050292	Elephantfish-brie412	Elephantfish (Brienomyrus brachyistius)	SRR19539412	PRJNA845781	SAMN28861277
1	C_AA050293	Elephantfish-brie445-BWNDV2	Elephantfish (Brienomyrus brachyistius)	SRR19539455, SRR1342268	PRJNA845781, PRJNA248545	SAMN28861261, SAMN02800480
1	C_AA050294	Elephantfish-brie463	Elephantfish (Brienomyrus brachyistius)	SRR19539463	PRJNA845781	SAMN28861256
1	C_AA050295	Elephantfish-brie514	Elephantfish (Brienomyrus brachyistius)	SRR19539514	PRJNA845781	SAMN28861264
1	C_AA050296	Elephantfish-brie518-BWNDV1	Elephantfish (Brienomyrus brachyistius)	SRR1299518	PRJNA248545	SAMN02799597
1	C_AA050297	Garfish-hypo768	Garfish (Hyporhamphus australis)	SRR7527767, SRR7527768	PRJNA481181	SAMN09662682, SAMN09662683
1	C_AA050298	Goose-anse398	Goose (Anser sp.)	SRR1060398	PRJNA232576	SAMN02486380
1	C_AA050299	Goose-anse577	Goose (Anser cygnoides)	SRR7782577	PRJNA489234	SAMN09951193
1	C_AA050300	Gorilla-gori959	Gorilla (Gorilla gorilla)	SRR8674959	PRJNA525703	SAMN11058241
1	C_AA050301	Gourd-lage699-B-gamm	Gourd (Lagenaria siceraria)	SRR8905699	PRJNA200441	SAMN11430761
1	C_AA050302	Grinner-aluo364	Grinner (Aulopiforme)	SRR6291364, SRR6291362, SRR6291361	PRJNA418053	SAMN08013986, SAMN08013988, SAMN08013987
1	C_AA050303	Hamster-olig706	Hamster (Oligoryzomys longicaudatus)	SRR1548706	PRJNA258076	SAMN02983233
1	C_AA050304	Icefish-chio058	Icefish (Chionodraco myersi)	SRR8197058	PRJNA505770	SAMN10434531
0.998	C_AA050305	Jack-trac480-g	Jack (Trachurus trachurus)	SRR11679480	PRJNA607895	SAMN14333405
1	C_AA050306	Kenaf-hibi953-DHBV	Kenaf (Hibiscus cannabinus)	SRR9157953, SRR9157951, SRR9157956	PRJNA545389	SAMN11890471, SAMN11890473, SAMN11890476
1	C_AA050307	Killifish-luca002-KNDV-Lg	Killifish (Lucania goodei)	SRR958002	PRJNA215087	SAMN02316538
1	C_AA050308	Killifish-luca778-KNDV-1	Killifish (Lucania parva)	SRR958778	PRJNA215087	SAMN02316550
1	C_AA050309	Lizard-sapr381	Australian Lizard (Saproscincus basiliscus)	SRR642381	PRJNA183544	SAMN01828507
1	C_AA050310	Lizard-scel233	Lizard (Sceloporus adleri)	SRR1286233	PRJNA246602	SAMN02768722
0.995	C_AA050311	Maize-zea024-g-DHBV	Maize (Zea mays)	SRR7814024, SRR7814022, SRR7814025	PRJNA489944	SAMN09995434, SAMN09995434, SAMN09995434
1	C_AA050312	Mango-mang850-C	Mango (Mangifera indica)	SRR8449850, SRR8449856, SRR8449857	PRJNA515564	SAMN10761909, SAMN10761910, SAMN10761911
0.865	C_AA050313	Monkey-rhin763-g-Frog	Snub-nosed monkey (Rhinopithecus bieti)	SRR1300763, SRR1300765, SRR1300771	PRJNA248058	SAMN02786314, SAMN02786316, SAMN02786322
1	C_AA050314	Mouse-mus228-D	Mouse (Mus musculus)	SRR6004228	PRJNA401746	SAMN07604538
1	C_AA050315	Mouse-mus235-DHBV	Mouse (Mus musculus)	SRR8667235	PRJNA525439	SAMN11051417
1	C_AA050316	Mouse-mus236-DHBV	Mouse (Mus musculus)	SRR8667236	PRJNA525439	SAMN11051416
1	C_AA050317	Mouse-mus238-DHBV	Mouse (Mus musculus)	SRR8667238	PRJNA525439	SAMN11051414
1	C_AA050318	Mouse-mus239-DHBV	Mouse (Mus musculus)	SRR8667239	PRJNA525439	SAMN11051413
1	C_AA050319	Mouse-mus241-DHBV	Mouse (Mus musculus)	SRR8667241	PRJNA525439	SAMN11051411
1	C_AA050320	Mouse-mus242-DHBV	Mouse (Mus musculus)	SRR8667242	PRJNA525439	SAMN11051410
1	C_AA050321	Mouse-mus490-Frog	Mouse (Mus musculus)	SRR8506490	PRJNA517810	SAMN10845668
1	C_AA050322	Mouse-mus537-DHBV	Mouse (Mus musculus)	SRR8077537	PRJNA497457	SAMN10258345
1	C_AA050323	Mouse-mus538-C	Mouse (Mus musculus)	SRR9639538, SRR9639537, SRR9639534	PRJNA552423	SAMN12206380, SAMN12206381, SAMN12206381
1	C_AA050324	Mouse-mus558-C	Mouse (Mus musculus)	SRR9206558	PRJNA546605	SAMN11962450
1	C_AA050325	Mouse-mus684-B	Mouse (Mus musculus)	ERR3199684	PRJEB31298	SAMEA5382466
1	C_AA050326	Mouse-mus738-C	Mouse (Mus musculus)	SRR11792738, SRR11792740	PRJNA632742	SAMN14918668, SAMN14918664
1	C_AA050327	Munia-lonc631	Munia (Lonchura striata)	SRR5223631	PRJNA369279	SAMN08347901
1	C_AA050328	Olive-elae168-DHBV	Olive (Elaeagnaceae)	SRR5127168	PRJNA357541	SAMN06142987
0.936	C_AA050329	Panda-ailu724-g-Frog	Giant panda (Ailuropoda melanoleuca)	ERR2366724	PRJEB25303	SAMEA104667421
0.958	C_AA050330	Pig-sus149-g-Frog	Pig (Sus scrofa)	SRR10357149, SRR10357145, SRR10357130	PRJNA580004	SAMN13149105, SAMN13149109, SAMN13149026
1	C_AA050331	Pig-sus412-B	Pig (Sus scrofa)	SRR8510412	PRJNA518006	SAMN10849974
1	C_AA050332	Pig-sus516-D-gamm	Pig (Sus scrofa)	SRR8241516, SRR8241514, SRR8241515	PRJNA506884	SAMN10475342, SAMN10475344, SAMN10475343
0.987	C_AA050333	Pig-sus989-g-Frog	Pig (Sus scrofa)	SRR6708989, SRR6708990	PRJNA433836	SAMN08518602
1	C_AA050334	Pigeon-colu431	Pigeon (Columba livia)	SRR7031431, SRR7031429, SRR7031406	PRJNA449259	SAMN08892325
1	C_AA050335	Porgy-acan628	Porgy (Acanthopagrus latus)	SRR11458628	PRJNA622226	SAMN14501697
1	C_AA050336	Porgy-pagr765	Porgy (Pagrus auratus)	SRR7527765	PRJNA481181	SAMN09662684
1	C_AA050337	Rat-ratt034-D-gamm	Rat (Rattus norvegicus)	SRR8424034	PRJNA514019	SAMN10718278
1	C_AA050338	Rat-ratt308-C	Rat (Rattus norvegicus)	SRR6675308	PRJNA431835	SAMN08408059
1	C_AA050339	Rat-ratt940-B-gamm	Rat (Rattus norvegicus)	SRR10821940	PRJNA598792	SAMN13716109
1	C_AA050340	SCucumber-apos635-Frog	Japanese sea cucumber (Apostichopus japonicus)	SRR9112635	PRJNA544365	SAMN11834744
1	C_AA050341	Salmon-onco573-SSNDV	Salmon (Oncorhynchus nerka)	SRR827573, SRR827572	PRJNA196843	SAMN02044729
1	C_AA050342	Salvia-salv264-C	Salvia (Salvia miltiorrhiza)	SRR11484264, SRR11484263, SRR11484260	PRJNA623221	SAMN14541899, SAMN14541900, SAMN14541903
1	C_AA050343	Sardine-sard271	Sardine (Sardinops Sagax)	SRR11928271	PRJNA637122	SAMN15097434
0.966	C_AA050344	Scallop-argo239-g-C	Scallop (Argopecten irradians)	SRR5469239	PRJNA383949	SAMN06820453
1	C_AA050345	Sesame-sesa285-D	Sesame (Sesamum indicum)	SRR359285	PRJNA74261	SAMN00744891
1	C_AA050346	Shark-chil417	Bamboo shark (Chiloscyllium griseum)	SRR15990417	PRJNA688989	SAMN17193099
1	C_AA050347	Soil-soil880-D	Soil (Ecological metagenome)	SRR10072880	PRJNA563914	SAMN12693040
1	C_AA050348	Soil-soil880-D-aspilia	Soil (Ecological metagenome)	SRR10072880	PRJNA563914	SAMN12693040
1	C_AA050349	Songbird-pira715	Songbird (Piranga ludoviciana)	SRR8792715	PRJNA529266	SAMN11263491
1	C_AA050350	Stickleback-gast146	Stickleback (Gasterosteus aculeatus)	SRR14293146	PRJNA723504	SAMN18819919
1	C_AA050351	Stickleback-gast624	Stickleback (Gasterosteus aculeatus)	SRR16676624	PRJNA776820	SAMN22818851
1	C_AA050352	Stickleback-gast636	Stickleback (Gasterosteus aculeatus)	SRR16676636	PRJNA776820	SAMN22818863
1	C_AA050353	Sturgeon-acip200	Sturgeon (Acipenser ruthenus x Huso huso)	SRR8772200	PRJNA523995	SAMN11189944
1	C_AA050354	Toad-bufo524	Asiatic Toad (Bufo Gargarizans)	SRR14214524	PRJNA721217	SAMN18710884
1	C_AA050355	Wasp-tric502-C	Wasp (Trichopria drosophilae)	SRR7513502	PRJNA480773	SAMN09644909
1	C_AA050356	Wasp-tric503-C	Wasp (Trichopria drosophilae)	SRR7513503	PRJNA480773	SAMN09644910
1	C_AA050357	Water-lake856-D	Water (Lake water)	SRR4995856	PRJNA352457	SAMN05990278
1	C_AA050358	Water-wate700-C	Wastewater (Ecological metagenome)	ERR2596700	PRJEB23496	SAMEA4527665
1	C_AA050359	Woad-isat287-B-gamm	Woad (Isatis tinctoria)	SRR7875287	PRJNA491805	SAMN10089245
1	C_AA050360	Woad-isat291-D-gamm	Woad (Isatis tinctoria)	SRR7875291	PRJNA491805	SAMN10089241
1	C_AA050361	Yeast-sacc286-Frog	Yeast (Saccharomyces cerevisiae)	SRR10815286	PRJNA598580	SAMN13708444
